1 **Complete genome sequence of *Xylella taiwanensis* and comparative analysis**  
2 **of virulence gene content with *Xylella fastidiosa***

3

4 **Running Head:** Genome analysis of *Xylella taiwanensis*

5

6 Ling-Wei Weng<sup>1#</sup>, Yu-Chen Lin<sup>2#</sup>, Chiou-Chu Su<sup>3</sup>, Ching-Ting Huang<sup>2</sup>, Shu-Ting

7 Cho<sup>2</sup>, Ai-Ping Chen<sup>2</sup>, Shu-Jen Chou<sup>2</sup>, Chi-Wei Tsai<sup>1\*</sup>, Chih-Horng Kuo<sup>2\*</sup>

8

9 <sup>1</sup> Department of Entomology, National Taiwan University, Taipei, Taiwan

10 <sup>2</sup> Institute of Plant and Microbial Biology, Academia Sinica, Taipei, Taiwan

11 <sup>3</sup> Division of Pesticide Application, Taiwan Agricultural Chemicals and Toxic

12 Substances Research Institute, Taichung, Taiwan

13

14 # Equal contribution

15 \* Authors for Correspondence:

16 Chi-Wei Tsai, Department of Entomology, National Taiwan University, Taipei,

17 Taiwan. Phone: +886-2-33665576; E-mail: [chiwei@ntu.edu.tw](mailto:chiwei@ntu.edu.tw)

18 Chih-Horng Kuo, Institute of Plant and Microbial Biology, Academia Sinica, Taipei,

19 Taiwan. Phone: +886-2-27871127; E-mail: [chk@gate.sinica.edu.tw](mailto:chk@gate.sinica.edu.tw)

20

21

22 **Author Contribution**

23 Conceptualization: CWT, CHK

24 Funding acquisition: CWT, CHK

25 Investigation: LWW, YCL, CTH

26 Methodology: CCS, STC, APC, SJC, CHK

27 Project administration: CWT, CHK

28 Resources: CCS, CWT, CHK

29 Supervision: CWT, CHK

30 Validation: LWW, YCL, CTH

31 Visualization: LWW, YCL, CTH

32 Writing – original draft: LWW, CHK

33 Writing – review & editing: LWW, YCL, CCS, CTH, STC, APC, SJC, CWT, CHK

34

35

36 **Abstract**

37           The bacterial genus *Xylella* contains plant pathogens that are major threats to  
38 agriculture worldwide. Although extensive research was conducted to characterize  
39 different subspecies of *Xylella fastidiosa* (*Xf*), comparative analysis at above-species  
40 levels were lacking due to the unavailability of appropriate data sets. Recently, a  
41 bacterium that causes pear leaf scorch (PLS) in Taiwan was described as the  
42 second *Xylella* species (i.e., *Xylella taiwanensis*; *Xt*). In this work, we report the  
43 complete genome sequence of *Xt* type strain PLS229<sup>T</sup>. The genome-scale  
44 phylogeny provided strong support that *Xf* subspecies *pauca* (*Xfp*) is the basal  
45 lineage of this species and *Xylella* was derived from the paraphyletic genus  
46 *Xanthomonas*. Quantification of genomic divergence indicated that different *Xf*  
47 subspecies share ~87-95% of their genomic segments, while the two *Xylella* species  
48 share only ~66-70%. Analysis of overall gene content suggested that *Xt* is most  
49 similar to *Xf* subspecies *sandyi* (*Xfs*). Based on the existing knowledge of *Xf*  
50 virulence genes, the homolog distribution among 28 *Xylella* representatives was  
51 examined. Among the 10 functional categories, those involved in secretion,  
52 metabolism, and stress response are the most conserved ones with no copy number  
53 variation. In contrast, several genes related to adhesins, hydrolytic enzymes, and  
54 toxin-antitoxin systems are highly variable in their copy numbers. Those virulence  
55 genes with high levels of conservation or variation may be promising candidates for  
56 future studies. In summary, the new genome sequence and analysis reported in this  
57 work contributed to the study of several important pathogens in the family  
58 Xanthomonadaceae.

59

60

61 **Keywords**

62 *Xylella*, Xanthomonadaceae, plant pathogens, pear leaf scorch, genome,

63 virulence

64

65

## 66 Introduction

67 The gammaproteobacterium *Xylella fastidiosa* (*Xf*) is a xylem-limited and  
68 fastidious plant pathogen (Wells et al. 1987). To date, more than 563 plant species in  
69 82 families have been reported as hosts for *Xf* (European Food Safety Authority  
70 2018). *Xf* could be classified into at least five subspecies; some of the notable  
71 examples include *Xf* subspecies *fastidiosa* (*Xff*) that causes Pierce's Disease (PD) of  
72 grapevine, *Xf* subspecies *pauca* (*Xfp*) that causes citrus variegated chlorosis (CVC)  
73 and olive quick decline syndrome (OQDS), and *Xf* subspecies *sandyi* (*Xfs*) that  
74 causes oleander leaf scorch (OLS). Because of their economic and ecological  
75 impacts, substantial resources have been devoted to related research. Notably,  
76 several large-scale studies were conducted to investigate the genomic diversity and  
77 evolution of *Xf*. Based on a comparison of 72 strains, the five *Xf* subspecies harbor  
78 high levels of genetic diversity (Vanhove et al. 2019). With an average gene content  
79 of ~2,150 per strain, the core genome (i.e., genes shared by >95% of the strains)  
80 contains only ~900 genes, while the pangenome contains ~10,000 genes. Moreover,  
81 although certain patterns of sequence divergence were found among those  
82 subspecies (Denancé et al. 2019), extensive recombination occurred at the levels of  
83 within- and between-subspecies (Potnis et al. 2019).

84 In contrast to the extensive genomic research at within-species level,  
85 comparative studies of *Xf* at higher taxonomic levels were lacking. Under the current  
86 taxonomy, *Xylella* belongs to the family Xanthomonadaceae and is most closely  
87 related to *Xanthomonas* (Rodriguez-R et al. 2012; Anderson et al. 2013). However,  
88 the genomic divergence between *Xylella* and *Xanthomonas* is very high in terms of  
89 chromosomal organization, gene content, and sequence variation. Thus, extracting  
90 biological insights from such comparisons is difficult. At within-genus level, *Xf* was

91 largely considered as the only species within this genus since it was formally  
92 described in 1987 (Wells et al. 1987), which made between-species comparison  
93 infeasible. Intriguingly, a *Xylella* lineage that causes pear leaf scorch (PLS) in  
94 Taiwan was found to exhibit a slightly lower level of 16S rRNA gene sequence  
95 identity at 97.8-98.6% when compared to different subspecies of *Xf* (Su et al. 2012).  
96 In 2016, this PLS *Xylella* was formally reclassified as a novel species *Xylella*  
97 *taiwanensis* (*Xt*) based on a polyphasic approach (Su et al. 2016). Although a draft  
98 genome sequence of *Xt* was published earlier (Su et al. 2014), it was highly  
99 fragmented and no comparative analysis of gene content between *Xt* and *Xf* has  
100 been conducted.

101 To fill this gap, we determined the complete genome sequence of the type  
102 strain of *Xt* (i.e., PLS229<sup>T</sup>) for comparative analysis with its relatives. In addition to  
103 providing a genome-level overview of their diversity and evolution, we utilized the  
104 existing knowledge of *Xff* virulence genes (Rapicavoli et al. 2018) and conducted  
105 detailed comparisons of virulence gene content among different *Xylella* lineages.

106

## 107 **Materials and Methods**

108 The strain was acquired from the Bioresource Collection and Research  
109 Centre (BCRC) in Taiwan (accession 80915). The procedures for genome  
110 sequencing and comparative analysis were based on those described in our  
111 previous studies (Lo et al. 2013; Lo et al. 2018; Cho et al. 2020). All bioinformatics  
112 tools were used with the default settings unless stated otherwise.

113 Briefly, the strain was cultivated on PD2 medium as described (Su et al. 2016)  
114 for DNA extraction using Wizard Genomic DNA Purification Kit (A1120; Promega,  
115 USA). For Illumina sequencing, a paired-end library with a target insert size of 550-

116 bp was prepared using KAPA LTP Library Preparation Kit (KK8232; Roche,  
117 Switzerland) without amplification, then sequenced using MiSeq Reagent Nano Kit  
118 v2 (MS-103-1003; Illumina, USA) to obtain ~50X coverage. For Oxford Nanopore  
119 Technologies (ONT) sequencing, the library was prepared using ONT Ligation Kit  
120 (SQK-LSK109) and sequenced using MinION (FLO-MIN106; R9.4 chemistry and  
121 MinKNOW Core v3.6.0) to obtain ~228X coverage; Guppy v3.4.5 was used for  
122 basecalling. The raw reads were combined for *de novo* assembly by using Unicycler  
123 v0.4.8-beta (Wick et al. 2017). For validation, the Illumina and ONT raw reads were  
124 mapped to the assembly using BWA v0.7.12 (Li and Durbin 2009) and Minimap2  
125 v2.15 (Li 2018), respectively. The results were programmatically checked using  
126 SAMtools v1.2 (Li et al. 2009) and manually inspected using IGV v2.3.57 (Robinson  
127 et al. 2011). The finalized assembly was submitted to the National Center for  
128 Biotechnology Information (NCBI) and annotated using their Prokaryotic Genome  
129 Annotation Pipeline (PGAP) (Tatusova et al. 2016).

130 A total of 40 genomes ([supplementary table S1](#)) were used for comparative  
131 analysis. Our taxon sampling mainly focused on the strains that could represent the  
132 known *Xylella* diversity (Vanhove et al. 2019). Two other genera were included for  
133 comparative analysis. For the closely-related *Xanthomonas*, 10 species were  
134 selected to represent the key lineages (Parkinson et al. 2009; Rodriguez-R et al.  
135 2012). For the distantly-related *Pseudoxanthomonas*, only two species were  
136 sampled.

137 Genome-wide comparisons were conducted using fastANI v1.1 (Jain et al.  
138 2018). Homologous gene clusters were identified using BLASTP v2.10.0+ (Camacho  
139 et al. 2009) and OrthoMCL v1.3 (Li et al. 2003). For gene content comparisons, the  
140 homolog clustering result was converted into a matrix of 40 genomes by 11,455

141 clusters with the value in each cell corresponding to the copy number. This matrix  
142 was converted into a Jaccard distance matrix among genomes using VEGAN  
143 package v2.5-6 in R, then processed using the principal coordinates analysis  
144 function in APE v5.4 (Paradis and Schliep 2019) and visualized using ggplot2 v3.3.2  
145 (Wickham 2016). For phylogenetic analysis, homologous sequences were aligned  
146 using MUSCLE v3.8.31 (Edgar 2004). The maximum likelihood inference was  
147 performed using PhyML v.3.3.20180214 (Guindon and Gascuel 2003); the  
148 proportion of invariable sites and the gamma distribution parameter were estimated  
149 from the data set and the number of substitute rate categories was set to four. The  
150 PROTDIST program of PHYLIP v3.697 (Felsenstein 1989) was used to calculate  
151 sequence similarities.

152

## 153 **Results and Discussion**

### 154 Genome Characteristics

155 Strain *Xf* PLS229<sup>T</sup> has one 2,824,877-bp circular chromosome with 53.3%  
156 G+C content; no plasmid was found. The annotation contains two complete sets of  
157 16S-23S-5S rRNA genes, 49 tRNA genes, and 2,176 protein-coding genes. This  
158 genome size is near the upper range of those *Xf* representatives (median: 2.54 Mb;  
159 range: 2.39-2.88 Mb) and much smaller compared to *Xanthomonas* spp. (median:  
160 5.09 Mb; range: 3.76-5.35 Mb) ([supplementary table S1](#)). The genome sizes and  
161 the numbers of protein-coding genes have a correlation coefficient of 0.989 ( $p <$   
162  $2.2e^{-16}$ ).

163

### 164 Molecular Phylogeny and Genome Divergence



165 A total of 779 single-copy genes were found to be shared by the 40  
166 Xanthomonadaceae genomes compared ([supplementary table S1](#)). Based on the  
167 concatenated alignment of these genes, a robust maximum likelihood phylogeny was  
168 inferred ([fig. 1A](#)). The availability of this *Xt* genome sequence provided a more  
169 appropriate outgroup to root the *Xf* phylogeny and further supported that *Xfp* is the  
170 basal lineage (Denancé et al. 2019; Potnis et al. 2019; Vanhove et al. 2019).

171 The genus *Xanthomonas* was known to be paraphyletic but the relationships  
172 of its two major clades (i.e., represented by *Xanthomonas albilineans* and  
173 *Xanthomonas campestris*, respectively) with *Xylella* were controversial (Pieretti et al.  
174 2009; Rodriguez-R et al. 2012). With our genome-scale phylogeny, it is clear that  
175 *Xylella* is more closely related to *X. campestris* and has experienced genome  
176 reduction since their divergence ([fig. 1A](#)).

177 When the genetic divergence was measured by sequence conservation,  
178 comparisons within each of the five *Xf* subspecies found that 88.8-99.8% of the  
179 genomic segments are shared and those segments have 98.5-100% average  
180 nucleotide identity (ANI) ([supplementary fig. S1](#)). For between-subspecies  
181 comparisons, 86.6-94.8% of the genomic segments are shared and those segments  
182 have 96.3-98.8% ANI. When those *Xf* subspecies were compared to *Xt*, only 66.4-  
183 70.3% of the genomic segments are shared and those segments have 82.9-83.4%  
184 ANI. These results are consistent with previous findings (Su et al. 2016; Denancé et  
185 al. 2019) and provide further support to the current taxonomy based on the 95% ANI  
186 threshold recommended for delineating bacterial species (Jain et al. 2018).

187 Because the ANI approach provides low resolutions when the values drop to  
188 ~80% (Jain et al. 2018) and may not be appropriate for cross-genus comparisons,  
189 we also evaluated divergence based on the protein sequences of those 779

190 Xanthomonadaceae core genes. The two *Xylella* species have ~88.8-89.1%  
191 sequence similarity, which is lower than the values observed in the comparisons  
192 among those eight *X. campestris* clade representatives (median = 93.8%; range =  
193 92.6-97.2%), comparable to the *X. albilineans*-*X. hyacinthi* comparison (88.6%), and  
194 higher than the *P. mexicana*-*P. spadix* comparison (75.4%).

195 In addition to sequences, the divergence in gene content was also examined.  
196 When all 40 genomes were compared together, the grouping patterns (**fig. 1B**) are  
197 consistent with the phylogenetic relationships (**fig. 1A**). Despite the similarities in  
198 gene counts (**supplementary table S1**), *Xt* is distinct from all *Xf* subspecies based  
199 on the gene content. For within-*Xylella* comparisons, genomes are clustered based  
200 on the taxonomic assignments and *Xt* is most similar to *Xfs* (**fig. 1C**). Intriguingly, *Xfs*  
201 is similar to *Xt* in terms of having a narrow host range (i.e., restricted to oleander and  
202 pear, respectively), while other *Xf* subspecies can infect a wide range of hosts (Baldi  
203 and Porta 2017; Rapicavoli et al. 2018).

204

## 205 Virulence Genes and Pathogenicity Factors

206 Based on the current knowledge of putative virulence genes and  
207 pathogenicity factors identified in *Xff* (Rapicavoli et al. 2018), these genes may be  
208 classified into 10 major functional categories (**fig. 2**). Among these, secretion  
209 systems, metabolism, and stress response are the most conserved categories with  
210 no variation in gene copy number across all *Xylella* representatives. In contrast,  
211 several genes related to adhesins, hydrolytic enzymes, and toxin-antitoxin systems  
212 are highly variable in copy numbers.

213 For more detailed examination, these putative virulence genes were classified  
214 into 34 homologous gene clusters and four are absent in the *Xt* genome. These

215 include the genes that encode a putative adhesin (PD0986, hemagglutinin-like  
216 protein), two hydrolytic enzymes (PD0956, serine protease; PD1485,  
217 polygalacturonase), and a toxin (PD1100, endoribonuclease). Based on previous  
218 studies that characterized mutant phenotypes, PD0956 (Gouran et al. 2016) and  
219 PD1100 (Burbank and Stenger 2017) are both antivirulence factors and the loss of  
220 either one resulted in hypervirulence of *Xff* in grapevines. In contrast, both PD0986  
221 and PD1485 are critical for *Xff* virulence in grapevines. For PD0986, this gene is  
222 absent in a *Xf* biocontrol strain EB92-1 that can infect and persist in grapevines but  
223 causes only very slight symptoms. When PD0986 is cloned into EB92-1, the  
224 transformant induces significantly increased symptoms that are characteristic of PD  
225 (Zhang et al. 2015). For PD1485, the knockout mutant was avirulent due to the loss  
226 of ability to systemically colonize grapevines (Roper et al. 2007).

227         Two gene families appeared to have experienced copy number expansion in  
228 the *Xt* genome. The first family includes homologs of PD1792 and PD2118, which  
229 encode hemagglutinins. These adhesins are antivirulence factors that restrict *in*  
230 *planta* movement by promoting self-aggregation; transposon-insertion mutants of *Xff*  
231 PD1792 and PD2118 both exhibit hypervirulence in grapevines (Guilhabert and  
232 Kirkpatrick 2005). Among the representative *Xf* and *Xff* genomes, the median copy  
233 numbers of this family are 3 and 8, respectively. In comparison, *Xt* has 12 copies. It  
234 remains to be investigated if the copy number variation is linked to protein  
235 expression level and virulence. The second family includes a Zot-like toxin (PD0928).  
236 Similar to PD0986 (hemagglutinin-like protein), the biocontrol strain EB92-1 lacks the  
237 homolog of PD0928 and the transformant that expresses this gene is virulent (Zhang  
238 et al. 2015).

239

## 240 Conclusions

241 In conclusion, this work reported the complete genome sequence of an  
242 important plant-pathogenic bacterium that is endemic to Taiwan. In addition to  
243 providing the genomic resource that contributes to the study of this pathogen, this  
244 species is the only known sister of *Xf*, which has extensive genetic variations and  
245 devastating effects on agriculture worldwide. The availability of this new *Xt* genome  
246 sequence provides critical genomic information of a key lineage that may improve  
247 the study of *Xylella* evolution and the inference of *Xf* ancestral states. At above-  
248 genus level, our genome-scale phylogenetic inference resolved the relationships  
249 between *Xylella* and *Xanthomonas*, which are some of the key plant pathogens in  
250 the family Xanthomonadaceae.

251 For gene content analysis, our comparison of the putative virulence genes  
252 and pathogenicity factors among representative *Xylella* strains identified the genes  
253 that exhibit high levels of conservation or diversity ([fig. 2](#)). These genes are  
254 promising candidates for future functional studies to investigate the molecular  
255 mechanisms of *Xylella* virulence. Previous characterizations of single-gene mutants,  
256 particularly those conducted in *Xff*, have provided a strong foundation ([Radicavoli et](#)  
257 [al. 2018](#)). For further improvements, experimental studies that examine the  
258 combined effects of multiple virulence genes and extension to other *Xylella* lineages  
259 will be critical.

260

261

262 **Data Availability**

263 The complete genome sequence of *Xylella taiwanensis* PLS229<sup>T</sup> has been  
264 deposited in GenBank/ENA/DDBJ under the accession CP053627. The raw reads  
265 have been deposited at the NCBI Sequence Read Archive under the accession  
266 numbers SRR11805344 and SRR11805345.

267

268 **Acknowledgments**

269 The Illumina and Oxford Nanopore sequencing library preparation service was  
270 provided by the Genomic Technology Core (Institute of Plant and Microbial Biology,  
271 Academia Sinica). The Illumina MiSeq sequencing service was provided by the  
272 Genomics Core (Institute of Molecular Biology, Academia Sinica).

273

274 **Funding**

275 The funding was provided by the Ministry of Science and Technology of  
276 Taiwan (MOST 106-2923-B-002-005-MY3) to CWT and Academia Sinica to CHK.  
277 The funders had no role in study design, data collection and interpretation, or the  
278 decision to submit the work for publication.

279

280 **Conflict of Interest**

281 The authors declare no conflict of interest.

282

283

284 **Literature Cited**

- 285 Anderson I et al. 2013. Genome sequence of *Frateuria aurantia* type strain (Kondô  
286 67<sup>T</sup>), a xanthomonade isolated from *Lilium auratum* Lindl. Stand Genomic Sci.  
287 9:83. doi: 10.4056/sigs.4338002.
- 288 Baldi P, La Porta N. 2017. *Xylella fastidiosa*: host range and advance in molecular  
289 identification techniques. Front Plant Sci. 8:944. doi: 10.3389/fpls.2017.00944.
- 290 Burbank LP, Stenger DC. 2017. The DinJ/RelE toxin-antitoxin system suppresses  
291 bacterial proliferation and virulence of *Xylella fastidiosa* in grapevine.  
292 Phytopathology. 107:388–394. doi: 10.1094/PHYTO-10-16-0374-R.
- 293 Camacho C et al. 2009. BLAST+: architecture and applications. BMC Bioinformatics.  
294 10:421. doi: 10.1186/1471-2105-10-421.
- 295 Cho S-T et al. 2020. Complete genome sequence of “*Candidatus* Phytoplasma  
296 asteris” RP166, a plant pathogen associated with rapeseed phyllody disease  
297 in Poland. Microbiol Resour Announc. 9. doi: 10.1128/MRA.00760-20.
- 298 Denancé N, Briand M, Gaborieau R, Gaillard S, Jacques M-A. 2019. Identification of  
299 genetic relationships and subspecies signatures in *Xylella fastidiosa*. BMC  
300 Genomics. 20:239. doi: 10.1186/s12864-019-5565-9.
- 301 Edgar RC. 2004. MUSCLE: multiple sequence alignment with high accuracy and  
302 high throughput. Nucl Acids Res. 32:1792–1797. doi: 10.1093/nar/gkh340.
- 303 European Food Safety Authority. 2018. Update of the *Xylella* spp. host plant  
304 database. EFSA Journal. 16:e05408. doi: 10.2903/j.efsa.2018.5408.
- 305 Felsenstein J. 1989. PHYLIP - phylogeny inference package (version 3.2). Cladistics.  
306 5:164–166.

- 307 Guindon S, Gascuel O. 2003. A simple, fast, and accurate algorithm to estimate  
308 large phylogenies by maximum likelihood. *Syst Biol.* 52:696–704. doi:  
309 10.1080/10635150390235520.
- 310 Gouran H et al. 2016. The secreted protease PrtA controls cell growth, biofilm  
311 formation and pathogenicity in *Xylella fastidiosa*. *Sci Rep.* 6:31098. doi:  
312 10.1038/srep31098.
- 313 Guilhabert MR, Kirkpatrick BC. 2005. Identification of *Xylella fastidiosa* antivirulence  
314 genes: hemagglutinin adhesins contribute to *X. fastidiosa* biofilm maturation  
315 and colonization and attenuate virulence. *Mol Plant Microbe Interact.* 18:856–  
316 868. doi: 10.1094/MPMI-18-0856.
- 317 Jain C, Rodriguez-R LM, Phillippy AM, Konstantinidis KT, Aluru S. 2018. High  
318 throughput ANI analysis of 90K prokaryotic genomes reveals clear species  
319 boundaries. *Nat Commun.* 9:5114. doi: 10.1038/s41467-018-07641-9.
- 320 Li H. 2018. Minimap2: pairwise alignment for nucleotide sequences. *Bioinformatics.*  
321 34:3094–3100. doi: 10.1093/bioinformatics/bty191.
- 322 Li H et al. 2009. The Sequence Alignment/Map format and SAMtools. *Bioinformatics.*  
323 25:2078–2079. doi: 10.1093/bioinformatics/btp352.
- 324 Li H, Durbin R. 2009. Fast and accurate short read alignment with Burrows–Wheeler  
325 transform. *Bioinformatics.* 25:1754–1760. doi: 10.1093/bioinformatics/btp324.
- 326 Li L, Stoeckert CJ, Roos DS. 2003. OrthoMCL: identification of ortholog groups for  
327 eukaryotic genomes. *Genome Res.* 13:2178–2189. doi: 10.1101/gr.1224503.
- 328 Lo W-S, Chen L-L, Chung W-C, Gasparich GE, Kuo C-H. 2013. Comparative  
329 genome analysis of *Spiroplasma melliferum* IPMB4A, a honeybee-associated  
330 bacterium. *BMC Genomics.* 14:22. doi: 10.1186/1471-2164-14-22.

- 331 Lo W-S, Gasparich GE, Kuo C-H. 2018. Convergent evolution among ruminant-  
332 pathogenic *Mycoplasma* involved extensive gene content changes. *Genome*  
333 *Biol Evol.* 10:2130–2139. doi: 10.1093/gbe/evy172.
- 334 Parkinson N, Cowie C, Heeney J, Stead D. 2009. Phylogenetic structure of  
335 *Xanthomonas* determined by comparison of *gyrB* sequences. *Int J Syst Evol*  
336 *Microbiol.* 59:264–274. doi: 10.1099/ijs.0.65825-0.
- 337 Pieretti I et al. 2009. The complete genome sequence of *Xanthomonas albilineans*  
338 provides new insights into the reductive genome evolution of the xylem-limited  
339 Xanthomonadaceae. *BMC Genomics.* 10:616. doi: 10.1186/1471-2164-10-  
340 616.
- 341 Potnis N et al. 2019. Patterns of inter- and intrasubspecific homologous  
342 recombination inform eco-evolutionary dynamics of *Xylella fastidiosa*. *ISME J.*  
343 13:2319–2333. doi: 10.1038/s41396-019-0423-y.
- 344 Paradis E, Schliep K. 2019. ape 5.0: an environment for modern phylogenetics and  
345 evolutionary analyses in R. *Bioinformatics.* 35:526–528. doi:  
346 10.1093/bioinformatics/bty633.
- 347 Rapicavoli J, Ingel B, Blanco-Ulate B, Cantu D, Roper C. 2018. *Xylella fastidiosa*: an  
348 examination of a re-emerging plant pathogen. *Mol Plant Pathol.* 19:786–800.  
349 doi: <https://doi.org/10.1111/mpp.12585>.
- 350 Robinson JT et al. 2011. Integrative genomics viewer. *Nat Biotech.* 29:24–26. doi:  
351 10.1038/nbt.1754.
- 352 Rodriguez-R LM et al. 2012. Genomes-based phylogeny of the genus *Xanthomonas*.  
353 *BMC Microbiol.* 12:43. doi: 10.1186/1471-2180-12-43.
- 354 Roper MC, Greve LC, Warren JG, Labavitch JM, Kirkpatrick BC. 2007. *Xylella*  
355 *fastidiosa* requires polygalacturonase for colonization and pathogenicity in



- 356 *Vitis vinifera* grapevines. Mol Plant Microbe Interact. 20:411–419. doi:  
357 10.1094/MPMI-20-4-0411.
- 358 Su C-C et al. 2012. Specific characters of 16S rRNA gene and 16S–23S rRNA  
359 internal transcribed spacer sequences of *Xylella fastidiosa* pear leaf scorch  
360 strains. Eur J Plant Pathol. 132:203–216. doi: 10.1007/s10658-011-9863-6.
- 361 Su C-C et al. 2014. Draft genome sequence of *Xylella fastidiosa* pear leaf scorch  
362 strain in Taiwan. Genome Announc. 2:e00166-14. doi:  
363 10.1128/genomeA.00166-14.
- 364 Su C-C et al. 2016. *Xylella taiwanensis* sp. nov., causing pear leaf scorch disease.  
365 Int J Syst Evol Microbiol. 66:4766–4771. doi: 10.1099/ijsem.0.001426.
- 366 Tatusova T et al. 2016. NCBI prokaryotic genome annotation pipeline. Nucleic Acids  
367 Res. 44:6614–6624. doi: 10.1093/nar/gkw569.
- 368 Vanhove M et al. 2019. Genomic diversity and recombination among *Xylella*  
369 *fastidiosa* subspecies. Appl Environ Microbiol. 85:e02972-18. doi:  
370 10.1128/AEM.02972-18.
- 371 Wells JM et al. 1987. *Xylella fastidiosa* gen. nov., sp. nov: gram-negative, xylem-  
372 limited, fastidious plant bacteria related to *Xanthomonas* spp. Int J Syst  
373 Bacteriol. 37:136–143. doi: 10.1099/00207713-37-2-136.
- 374 Wick RR, Judd LM, Gorrie CL, Holt KE. 2017. Unicycler: Resolving bacterial genome  
375 assemblies from short and long sequencing reads. PLOS Comput Biol.  
376 13:e1005595. doi: 10.1371/journal.pcbi.1005595.
- 377 Wickham H. 2016. ggplot2: Elegant Graphics for Data Analysis. Springer-Verlag  
378 New York: New York, NY doi: 10.1007/978-0-387-98141-3.

379 Zhang S et al. 2015. Three new Pierce's Disease pathogenicity effectors identified  
380 using *Xylella fastidiosa* biocontrol strain EB92-1. PLOS ONE. 10:e0133796.  
381 doi: 10.1371/journal.pone.0133796.  
382

## 383 **Figure Legends**

384 **Fig. 1.** Evolutionary relationships between *Xylella taiwanensis* and its relatives in the  
385 family Xanthomonadaceae. (A) Maximum likelihood phylogeny based on 779 shared  
386 single-copy genes (252,319 aligned amino acid sites). The internal nodes illustrated  
387 in this tree all received >80% bootstrap support based on 1,000 replicates, including  
388 all nodes that represent the most recent common ancestors for each of the *X.*  
389 *fastidiosa* subspecies. Some of the relationships at the within-subspecies level were  
390 less well-supported; those parts were collapsed into triangles for simplified  
391 visualization. (B) Principal coordinates analysis of gene content dissimilarity. All 40  
392 Xanthomonadaceae genomes are included. The % variance explained by each  
393 coordinate is provided in parentheses. (C) Gene content dissimilarity among the 28  
394 *Xylella* genomes.

395

396 **Fig. 2.** Distribution of putative virulence genes and pathogenicity factors among  
397 representative *Xylella* genomes. *Xanthomonas oryzae* is included as the outgroup.  
398 The homologous gene clusters are identified by the PD numbers based on the  
399 annotation of Temecula1 genome (Rapicavoli et al. 2018); gene names are provided  
400 when available. Gene copy numbers are illustrated in the format of a heatmap;  
401 values higher than two are labeled with the exact numbers. Two adhesin genes (i.e.,  
402 PD1792 and PD2118) were assigned to the same homologous gene cluster and  
403 were combined for copy number calculation.

404

405

406 **Supplementary Materials**

407 **Supplementary table S1.** List of the genome sequences analyzed. The accession  
408 numbers, strain information, and genome characteristics are provided.

409

410 **Supplementary fig. S1.** Genome similarity among the representative *Xylella* strains.

411 The pairwise comparisons are classified into three categories: (1) within the same *X.*

412 *fastidiosa* subspecies, (2) between different *X. fastidiosa* subspecies, and (3)

413 between *X. fastidiosa* and *X. taiwanensis*.

414

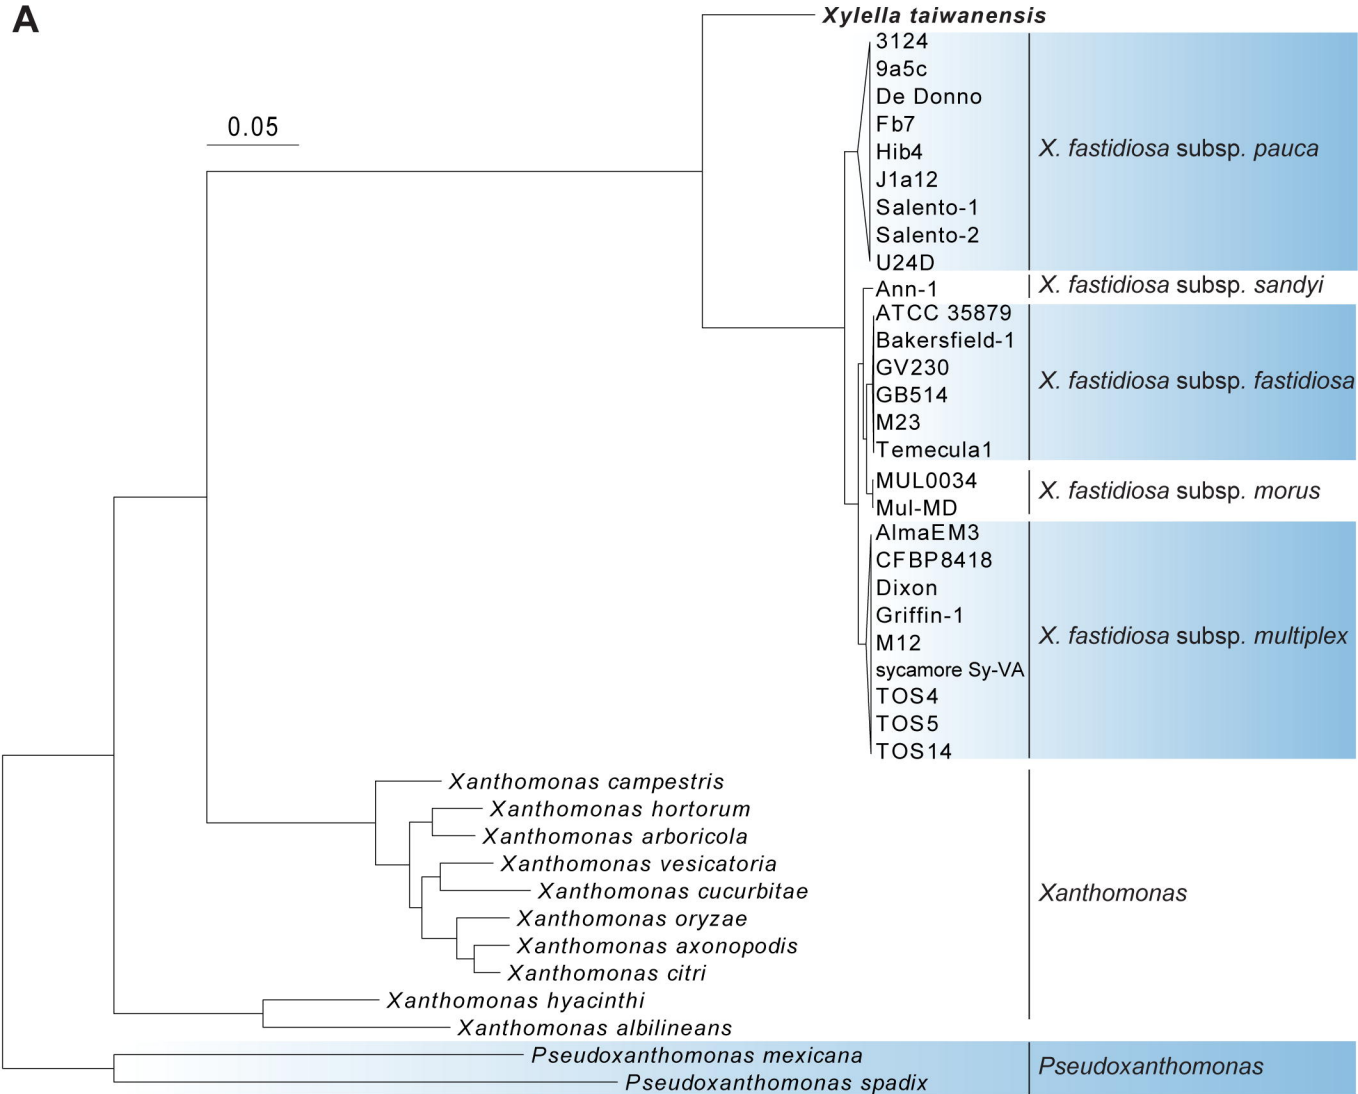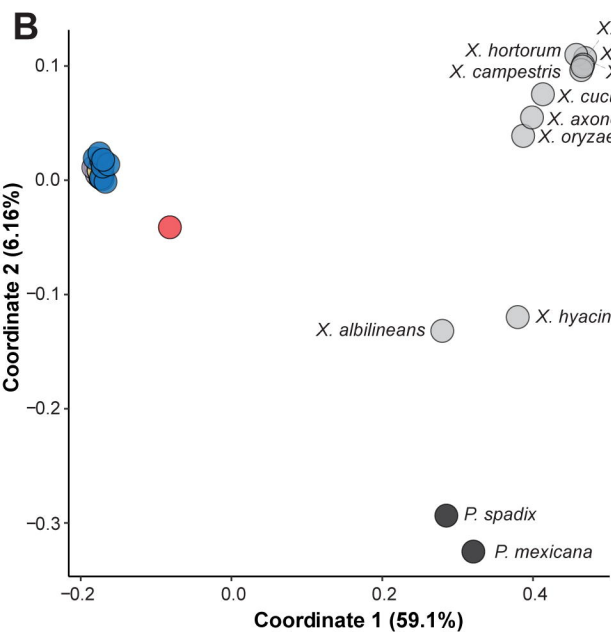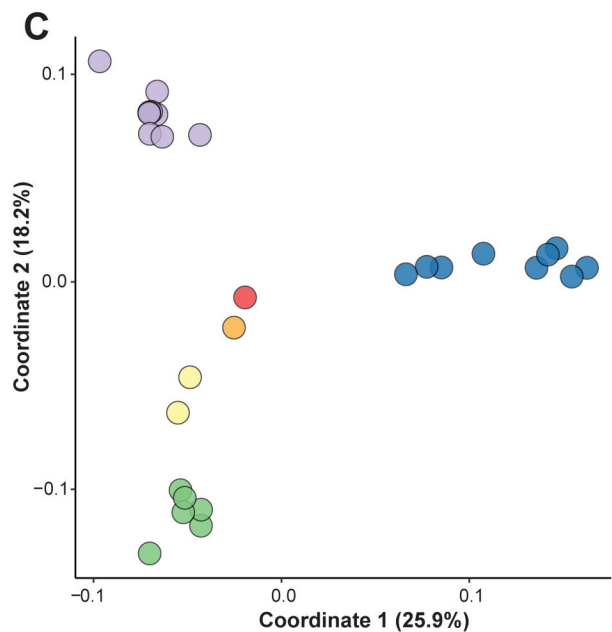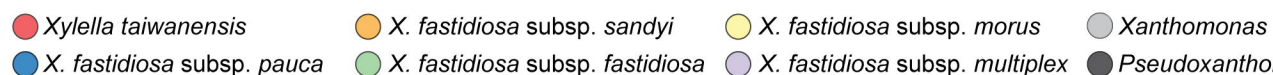

Source: https://biorxiv.org/content/10.1101/2021.03.08.434500v1.full.pdf
